# Supplementary material for: Comparative Analysis of Volatile and Non-Volatile Metabolites Derived from Bacillus subtilis Strains Producing Different Levels of Biogenic Amines
Source: MDPI journal article supplement (doi:10.3390/metabo13020219), 2023-02-02
Supplement: s1 [file s1]

**Comparative Analysis of Volatile and Non-Volatile Metabolites  
Derived from *Bacillus subtilis* Strains Producing Different Levels of  
Biogenic Amines**

**Table S1. Results of the validation of biogenic amines (BAs) analysis using HPLC.**

| <b>Biogenic amines</b> | <b>Range (mg/L)</b> | <b>Standard curve</b> | <b>Linearity (R<sup>2</sup>)</b> | <b>LOD(mg/L)</b> | <b>LOQ(mg/L)</b> |
|------------------------|---------------------|-----------------------|----------------------------------|------------------|------------------|
| PHE                    | 1-250               | $y = 0.03x + 0.04$    | 0.9983                           | 0.10             | 0.31             |
| PUT                    | 1-250               | $y = 0.14x + 0.06$    | 0.9999                           | 0.15             | 0.44             |
| HIS                    | 1-250               | $y = 0.12x + 0.01$    | 0.9999                           | 0.08             | 0.23             |
| SPD                    | 1-250               | $y = 0.09x + 0.21$    | 0.9989                           | 0.03             | 0.10             |
| CAD                    | 1-250               | $y = 0.11x + 0.26$    | 0.9997                           | 0.53             | 1.60             |
| TYR                    | 1-250               | $y = 0.08x + 0.06$    | 0.9998                           | 0.03             | 0.08             |

PHE, 2-phenylethylamine; PUT, putrescine; HIS, histamine; SPD, spermidine; CAD, cadaverine; TYR, tyramine.

**Table S2. Volatile metabolites identified in *Bacillus subtilis*.**

| NO.<br>a  | Volatile metabolites              | RI <sup>b</sup> | Relative peak area ratio (Mean±SD) <sup>c</sup> |                  |                  |                       |                       |                  |                  |                       | ID<br>d |
|-----------|-----------------------------------|-----------------|-------------------------------------------------|------------------|------------------|-----------------------|-----------------------|------------------|------------------|-----------------------|---------|
|           |                                   |                 | BL9                                             | BL17             | BL25             | BL33                  | BH9                   | BH17             | BH25             | BH33                  |         |
| Acids     |                                   |                 |                                                 |                  |                  |                       |                       |                  |                  |                       |         |
| v16       | acetic acid                       | 1461            | N.D. <sup>e</sup> ,<br>a <sup>f</sup>           | 0.028±<br>0.003b | 0.028±<br>0.009b | 0.024±<br>0.004b      | 0.056±<br>0.012a<br>b | 0.052±<br>0.009a | 0.046±<br>0.022a | 0.088±<br>0.022b      | A       |
| v24       | 3-methylbutanoic acid             | 1670            | N.D.a                                           | N.D.a            | N.D.a            | N.D.a                 | N.D.a                 | 0.034±<br>0.007b | 0.029±<br>0.005b | 0.029±<br>0.008b      | A       |
| v33       | pentanoic acid                    | 1869            | N.D.a                                           | N.D.a            | N.D.a            | 0.131±<br>0.039b      | N.D.a                 | N.D.a            | N.D.a            | N.D.a                 | A       |
| v42       | octanoic acid                     | 2058            | N.D.a                                           | N.D.a            | N.D.a            | N.D.a                 | N.D.a                 | N.D.a            | N.D.a            | 0.057±<br>0.002b      | A       |
| v45       | nonanoic acid                     | 2165            | N.D.a                                           | N.D.a            | N.D.a            | N.D.a                 | 0.055±<br>0.007b      | 0.028±<br>0.005a | 0.026±<br>0.004a | 0.104±<br>0.011c      | A       |
| v61       | dodecanoic acid                   | 2480            | 0.109±<br>0.045a                                | 0.148±<br>0.035a | 0.114±<br>0.005a | 0.125±<br>0.020a      | 0.041±<br>0.007b      | N.D.a            | N.D.a            | N.D.a                 | A       |
| v65       | tetradecanoic acid                | >250<br>0       | 0.256±<br>0.012b                                | N.D.a            | N.D.a            | N.D.a                 | N.D.a                 | N.D.a            | N.D.a            | N.D.a                 | A       |
| v66       | (12S)-12-methyltetradecanoic acid | >250<br>0       | N.D.a                                           | 0.895±<br>0.055b | N.D.a            | N.D.a                 | N.D.a                 | N.D.a            | N.D.a            | N.D.a                 | C       |
| v67       | hexadecanoic acid                 | >250<br>0       | 2.332±<br>0.081a                                | 2.725±<br>0.104b | 2.722±<br>0.231b | 2.652±<br>0.214a<br>b | 0.105±<br>0.014a      | 0.194±<br>0.032b | 0.133±<br>0.006a | 0.329±<br>0.027c      | A       |
| v68       | octadecanoic acid                 | >250<br>0       | 0.684±<br>0.116b                                | 0.276±<br>0.016a | 0.325±<br>0.076a | 0.889±<br>0.095c      | N.D.a                 | N.D.a            | N.D.a            | N.D.a                 | B       |
| Alcohols  |                                   |                 |                                                 |                  |                  |                       |                       |                  |                  |                       |         |
| v4        | butan-1-ol                        | 1159            | 0.100±<br>0.009a                                | 0.126±<br>0.004b | 0.142±<br>0.018b | 0.134±<br>0.002b      | 0.125±<br>0.028a<br>b | 0.093±<br>0.014a | 0.145±<br>0.020b | 0.132±<br>0.018a<br>b | A       |
| v17       | 2-ethylhexan-1-ol                 | 1512            | 0.305±<br>0.021b                                | 0.214±<br>0.044a | 0.475±<br>0.028c | 0.323±<br>0.022b      | 0.241±<br>0.027a      | 0.520±<br>0.033b | 0.292±<br>0.031a | 0.671±<br>0.049c      | A       |
| v64       | 2-(2-dodecoxyethoxy)ethanol       | >250<br>0       | N.D.a                                           | N.D.a            | 0.102±<br>0.100b | N.D.a                 | N.D.a                 | N.D.a            | N.D.a            | N.D.a                 | C       |
| Aldehydes |                                   |                 |                                                 |                  |                  |                       |                       |                  |                  |                       |         |
| v18       | benzaldehyde                      | 1524            | N.D.a                                           | 0.041±<br>0.016a | 0.325±<br>0.265b | 0.039±<br>0.006a      | 0.138±<br>0.012a<br>b | 0.199±<br>0.015c | 0.130±<br>0.008a | 0.155±<br>0.009a      | A       |
| Amines    |                                   |                 |                                                 |                  |                  |                       |                       |                  |                  |                       |         |
| v63       | 2-methyl-N-phenylaniline          | >250<br>0       | N.D.a                                           | N.D.a            | 0.077±<br>0.029b | N.D.a                 | N.D.a                 | N.D.a            | N.D.a            | N.D.a                 | C       |
| Benzenes  |                                   |                 |                                                 |                  |                  |                       |                       |                  |                  |                       |         |

|     |                       |      |                       |                  |                  |                  |                       |                  |                  |                  |   |
|-----|-----------------------|------|-----------------------|------------------|------------------|------------------|-----------------------|------------------|------------------|------------------|---|
| v7  | styrene               | 1252 | 0.048±<br>0.005b      | 0.042±<br>0.003b | 0.056±<br>0.018b | N.D.a            | 0.122±<br>0.016a<br>b | 0.149±<br>0.008b | 0.103±<br>0.013a | 0.134±<br>0.017b | A |
| v22 | 1-phenylethanone      | 1652 | 0.367±<br>0.024a<br>b | 0.180±<br>0.039a | 0.816±<br>0.520b | 0.249±<br>0.015a | 0.365±<br>0.053b      | N.D.a            | N.D.a            | N.D.a            | A |
| v28 | ethyl 2-phenylacetate | 1778 | N.D.a                 | N.D.a            | N.D.a            | N.D.a            | N.D.a                 | 0.027±<br>0.002b | N.D.a            | N.D.a            | B |
| v35 | 2-phenylethanol       | 1931 | N.D.a                 | 0.115±<br>0.051b | 0.246±<br>0.065c | 0.112±<br>0.007b | 0.119±<br>0.008a      | 0.198±<br>0.008b | 0.130±<br>0.024a | 0.183±<br>0.025b | A |
| v56 | benzoic acid          | 2427 | 0.281±<br>0.030a      | 0.265±<br>0.039a | 0.234±<br>0.051a | 0.249±<br>0.056a | N.D.a                 | N.D.a            | N.D.a            | N.D.a            | A |

#### *Esters*

|     |                                                           |      |                  |                  |                  |                       |                  |                  |                  |                  |   |
|-----|-----------------------------------------------------------|------|------------------|------------------|------------------|-----------------------|------------------|------------------|------------------|------------------|---|
| v3  | 3-methylbutyl acetate                                     | 1119 | N.D.a            | N.D.a            | 0.093±<br>0.058b | N.D.a                 | N.D.a            | N.D.a            | 0.045±<br>0.005c | 0.021±<br>0.004b | A |
| v12 | 3-oxobutan-2-yl acetate                                   | 1385 | 0.200±<br>0.027b | 0.209±<br>0.091b | 0.183±<br>0.017b | 0.072±<br>0.016a      | N.D.a            | 0.456±<br>0.016b | N.D.a            | N.D.a            | B |
| v34 | (1-hydroxy-2,4,4-trimethylpentan-3-yl) 2-methylpropanoate | 1893 | N.D.a            | N.D.a            | N.D.a            | N.D.a                 | 0.312±<br>0.080a | 0.309±<br>0.020a | 0.370±<br>0.012a | 0.554±<br>0.085b | C |
| v36 | 2-phenylethyl methylpropanoate                            | 1954 | 0.088±<br>0.019a | 0.233±<br>0.028b | 0.242±<br>0.045b | 0.204±<br>0.016b      | 0.216±<br>0.010c | 0.183±<br>0.013b | 0.162±<br>0.006a | 0.187±<br>0.012b | A |
| v38 | 2-phenylethyl methylbutanoate                             | 1978 | N.D.a            | 0.081±<br>0.038b | 0.090±<br>0.044b | 0.036±<br>0.007a<br>b | N.D.a            | N.D.a            | 0.043±<br>0.013b | 0.042±<br>0.012b | A |

#### *Furans*

|     |                    |      |                  |                  |                  |                  |                  |                  |                  |                  |   |
|-----|--------------------|------|------------------|------------------|------------------|------------------|------------------|------------------|------------------|------------------|---|
| v25 | furan-2-ylmethanol | 1675 | N.D.a            | N.D.a            | N.D.a            | N.D.a            | 0.022±<br>0.031a | N.D.a            | N.D.a            | N.D.a            | A |
| v31 | 3-phenylfuran      | 1847 | 0.171±<br>0.003c | 0.123±<br>0.015b | 0.121±<br>0.010b | 0.068±<br>0.005a | 0.340±<br>0.030b | 0.444±<br>0.046c | 0.260±<br>0.020a | 0.199±<br>0.037a | B |

#### *Hydrocarbons*

|     |               |      |                  |                  |                  |       |                  |                  |                  |                  |   |
|-----|---------------|------|------------------|------------------|------------------|-------|------------------|------------------|------------------|------------------|---|
| v6  | dodecane      | 1200 | N.D.a            | 0.007±<br>0.004b | N.D.a            | N.D.a | N.D.a            | N.D.a            | N.D.a            | N.D.a            | A |
| v21 | hexadecane    | 1600 | 0.044±<br>0.009a | 0.061±<br>0.017a | 0.182±<br>0.118b | N.D.a | N.D.a            | N.D.a            | N.D.a            | N.D.a            | A |
| v30 | octadecane    | 1800 | N.D.a            | N.D.a            | 0.181±<br>0.053b | N.D.a | N.D.a            | N.D.a            | N.D.a            | N.D.a            | A |
| v39 | cyclododecane | 1994 | 0.058±<br>0.019b | 0.101±<br>0.013c | N.D.a            | N.D.a | 0.074±<br>0.014a | 0.072±<br>0.025a | 0.059±<br>0.008a | 0.069±<br>0.004a | B |

#### *Ketones*

|    |              |           |       |       |       |                  |       |       |       |       |   |
|----|--------------|-----------|-------|-------|-------|------------------|-------|-------|-------|-------|---|
| v1 | propan-2-one | <100<br>0 | N.D.a | N.D.a | N.D.a | 0.093±<br>0.006b | N.D.a | N.D.a | N.D.a | N.D.a | C |
|----|--------------|-----------|-------|-------|-------|------------------|-------|-------|-------|-------|---|

|                               |                                   |      |                  |                  |                       |                  |                       |                       |                       |                  |   |
|-------------------------------|-----------------------------------|------|------------------|------------------|-----------------------|------------------|-----------------------|-----------------------|-----------------------|------------------|---|
| v5                            | heptan-2-one                      | 1179 | N.D.a            | 0.020±<br>0.000b | 0.026±<br>0.009b<br>c | 0.030±<br>0.002c | N.D.a                 | N.D.a                 | N.D.a                 | N.D.a            | B |
| v9                            | 3-hydroxybutan-2-one              | 1284 | 5.791±<br>0.383c | 1.426±<br>0.154b | 0.170±<br>0.025a      | 0.052±<br>0.003a | 2.063±<br>0.192b      | 6.298±<br>0.302c      | 0.040±<br>0.012a      | 0.046±<br>0.011a | A |
| v20                           | undecan-2-one                     | 1596 | N.D.a            | N.D.a            | N.D.a                 | N.D.a            | N.D.a                 | N.D.a                 | 0.014±<br>0.007b      | 0.013±<br>0.002b | A |
| v29                           | 1-phenylbutan-1-one               | 1792 | N.D.a            | N.D.a            | N.D.a                 | N.D.a            | N.D.a                 | N.D.a                 | N.D.a                 | 0.033±<br>0.012b | A |
| v41                           | pentadecan-2-one                  | 2014 | N.D.a            | N.D.a            | N.D.a                 | N.D.a            | N.D.a                 | 0.026±<br>0.011b      | N.D.a                 | N.D.a            | A |
| v47                           | 1-(2-aminophenyl)ethanone         | 2213 | 0.106±<br>0.007a | 0.080±<br>0.033a | 0.078±<br>0.033a      | 0.059±<br>0.012a | 0.063±<br>0.015a<br>b | 0.080±<br>0.012b      | 0.052±<br>0.010a      | 0.079±<br>0.004b | A |
| v48                           | heptadecan-2-one                  | 2225 | N.D.a            | N.D.a            | N.D.a                 | N.D.a            | N.D.a                 | N.D.a                 | N.D.a                 | 0.034±<br>0.003b | A |
| v58                           | diphenylmethanone                 | 2462 | N.D.a            | N.D.a            | 0.047±<br>0.012b      | N.D.a            | 0.025±<br>0.003b      | 0.021±<br>0.003a<br>b | 0.021±<br>0.002a<br>b | 0.017±<br>0.003a | B |
| v60                           | 2,3-dimethylnaphthalene-1,4-dione | 2477 | N.D.a            | N.D.a            | N.D.a                 | N.D.a            | N.D.a                 | N.D.a                 | 0.015±<br>0.002b      | N.D.a            | C |
| <i>Lactones</i>               |                                   |      |                  |                  |                       |                  |                       |                       |                       |                  |   |
| v26                           | 2H-furan-5-one                    | 1740 | 0.021±<br>0.002b | 0.028±<br>0.015b | N.D.a                 | N.D.a            | 0.035±<br>0.014b      | 0.026±<br>0.008b      | N.D.a                 | N.D.a            | A |
| v44                           | 5-octyloxolan-2-one               | 2134 | N.D.a            | N.D.a            | N.D.a                 | N.D.a            | N.D.a                 | 0.057±<br>0.006b      | 0.037±<br>0.004b      | 0.061±<br>0.024b | B |
| v46                           | 6-pentyloxan-2-one                | 2184 | N.D.a            | N.D.a            | N.D.a                 | N.D.a            | N.D.a                 | N.D.a                 | N.D.a                 | 0.012±<br>0.001b | A |
| v55                           | 6-heptyloxan-2-one                | 2415 | N.D.a            | N.D.a            | N.D.a                 | N.D.a            | N.D.a                 | N.D.a                 | N.D.a                 | 0.108±<br>0.008b | A |
| v59                           | 6-hexyloxan-2-one                 | 2475 | N.D.a            | N.D.a            | N.D.a                 | N.D.a            | N.D.a                 | N.D.a                 | N.D.a                 | 0.045±<br>0.002b | A |
| <i>N-containing compounds</i> |                                   |      |                  |                  |                       |                  |                       |                       |                       |                  |   |
| v27                           | N,N-dibutylformamide              | 1771 | N.D.a            | N.D.a            | N.D.a                 | N.D.a            | N.D.a                 | 0.024±<br>0.004b      | 0.018±<br>0.008b      | 0.027±<br>0.006b | B |
| v43                           | 4-methylquinoline                 | 2110 | 0.069±<br>0.016a | 0.084±<br>0.018a | 0.052±<br>0.025a      | 0.062±<br>0.004a | 0.053±<br>0.004a      | 0.063±<br>0.003b      | 0.062±<br>0.004b      | 0.077±<br>0.007c | B |
| <i>Phenols</i>                |                                   |      |                  |                  |                       |                  |                       |                       |                       |                  |   |
| v32                           | 2-methoxyphenol                   | 1856 | 0.093±<br>0.017a | 0.119±<br>0.005b | 0.099±<br>0.015a<br>b | 0.092±<br>0.002a | 0.153±<br>0.015a      | 0.195±<br>0.010a      | 0.362±<br>0.022c      | 0.310±<br>0.046b | B |
| v40                           | phenol                            | 2007 | 0.061±<br>0.020a | 0.075±<br>0.028a | 0.073±<br>0.005a      | 0.053±<br>0.013a | 0.050±<br>0.014a      | 0.047±<br>0.019a      | 0.092±<br>0.027b      | 0.112±<br>0.015b | A |

|                                           |                                        |      |                  |                       |                       |                       |                  |                       |                  |                  |   |
|-------------------------------------------|----------------------------------------|------|------------------|-----------------------|-----------------------|-----------------------|------------------|-----------------------|------------------|------------------|---|
| v51                                       | 2,6-dimethoxyphenol                    | 2269 | N.D.a            | 0.141±<br>0.038b      | 0.150±<br>0.060b      | 0.102±<br>0.028b      | 0.100±<br>0.004a | 0.260±<br>0.044b      | 0.235±<br>0.019b | 0.285±<br>0.039b | A |
| v52                                       | 2,4-ditert-butylphenol                 | 2311 | N.D.a            | N.D.a                 | N.D.a                 | N.D.a                 | 0.246±<br>0.001a | 0.358±<br>0.033b      | 0.254±<br>0.014a | 0.206±<br>0.088a | B |
| v54                                       | 4-ethenylphenol                        | 2395 | 0.264±<br>0.066c | 0.186±<br>0.051b<br>c | 0.151±<br>0.031b      | 0.064±<br>0.003a      | 0.234±<br>0.005a | 0.236±<br>0.031a      | 0.212±<br>0.017a | 0.249±<br>0.020a | B |
| <i>Pyrazines</i>                          |                                        |      |                  |                       |                       |                       |                  |                       |                  |                  |   |
| v8                                        | 2-methylpyrazine                       | 1269 | 0.104±<br>0.005b | 0.079±<br>0.002a      | 0.116±<br>0.019b<br>c | 0.125±<br>0.005c      | 0.103±<br>0.010a | 0.149±<br>0.024b      | 0.232±<br>0.015c | 0.153±<br>0.036b | A |
| v10                                       | 2,5-dimethylpyrazine                   | 1322 | 1.624±<br>0.124b | 1.294±<br>0.045a      | 1.627±<br>0.138b      | 1.661±<br>0.037b      | 1.815±<br>0.096a | 2.860±<br>0.145b      | 4.432±<br>0.239c | 2.767±<br>0.161b | A |
| v13                                       | 2-ethyl-5-methylpyrazine               | 1388 | 0.195±<br>0.032b | 0.125±<br>0.022a      | 0.100±<br>0.014a      | 0.085±<br>0.006a      | 0.176±<br>0.016a | 0.413±<br>0.146b      | 0.384±<br>0.023b | 0.207±<br>0.013a | B |
| v14                                       | 2,3,5-trimethylpyrazine                | 1406 | 0.185±<br>0.014b | 0.132±<br>0.007a      | 0.191±<br>0.019b      | 0.179±<br>0.006b      | 0.248±<br>0.007a | 0.377±<br>0.025b      | 0.475±<br>0.026c | 0.347±<br>0.018b | A |
| v15                                       | 3-ethyl-2,5-dimethylpyrazine           | 1444 | 0.167±<br>0.008c | 0.112±<br>0.010a      | 0.145±<br>0.024b<br>c | 0.121±<br>0.009a<br>b | 0.215±<br>0.010a | 0.314±<br>0.032b      | 0.389±<br>0.009c | 0.240±<br>0.004a | B |
| v19                                       | 2-ethenyl-3,5-dimethylpyrazine         | 1541 | 0.151±<br>0.015b | 0.090±<br>0.015a      | 0.115±<br>0.032a<br>b | 0.087±<br>0.004a      | 0.146±<br>0.012a | 0.255±<br>0.017c      | 0.266±<br>0.018c | 0.200±<br>0.021b | A |
| v23                                       | 2,5-dimethyl-3-(3-methylbutyl)pyrazine | 1655 | N.D.a            | N.D.a                 | N.D.a                 | N.D.a                 | N.D.a            | 0.396±<br>0.028b      | 0.384±<br>0.025b | N.D.a            | B |
| v53                                       | 2-(2-phenylethyl)pyrazine              | 2336 | 0.121±<br>0.025b | 0.077±<br>0.026a<br>b | 0.106±<br>0.030b      | 0.057±<br>0.005a      | 0.058±<br>0.007a | 0.098±<br>0.007c      | 0.102±<br>0.007c | 0.074±<br>0.004b | B |
| <i>Pyridines, pyrimidine and pyrroles</i> |                                        |      |                  |                       |                       |                       |                  |                       |                  |                  |   |
| v50                                       | 4-pyridin-4-ylpyridine                 | 2242 | N.D.a            | N.D.a                 | N.D.a                 | N.D.a                 | N.D.a            | N.D.a                 | N.D.a            | 0.048±<br>0.016b | A |
| v62                                       | 2,4,6-trimethyl-3-propan-2-ylpyridine  | 2500 | N.D.a            | N.D.a                 | N.D.a                 | N.D.a                 | N.D.a            | 0.030±<br>0.009b      | N.D.a            | N.D.a            | C |
| v49                                       | 2-phenylpyrimidine                     | 2241 | N.D.a            | N.D.a                 | 0.083±<br>0.036c      | 0.040±<br>0.001b      | 0.027±<br>0.006b | 0.038±<br>0.008c      | N.D.a            | N.D.a            | C |
| v37                                       | 1-(1H-pyrrol-2-yl)ethanone             | 1973 | N.D.a            | N.D.a                 | N.D.a                 | N.D.a                 | N.D.a            | N.D.a                 | 0.021±<br>0.005b | 0.023±<br>0.003b | A |
| v57                                       | 1H-indole                              | 2434 | N.D.a            | N.D.a                 | N.D.a                 | N.D.a                 | 0.061±<br>0.002b | 0.052±<br>0.002a<br>b | 0.050±<br>0.003a | 0.048±<br>0.008a | A |
| <i>S-containing compounds</i>             |                                        |      |                  |                       |                       |                       |                  |                       |                  |                  |   |
| v2                                        | (methyldisulfanyl)methan<br>e          | 1069 | 0.201±<br>0.015b | N.D.a                 | N.D.a                 | N.D.a                 | 0.266±<br>0.020b | 0.357±<br>0.018c      | 0.200±<br>0.084b | N.D.a            | A |

|     |                            |      |                   |                   |                   |                   |                   |                              |                   |                   |   |
|-----|----------------------------|------|-------------------|-------------------|-------------------|-------------------|-------------------|------------------------------|-------------------|-------------------|---|
| v11 | (methyltrisulfanyl)methane | 1366 | N.D. <sup>a</sup> | 0.029±<br>0.005 <sup>b</sup> | N.D. <sup>a</sup> | N.D. <sup>a</sup> | A |
|-----|----------------------------|------|-------------------|-------------------|-------------------|-------------------|-------------------|------------------------------|-------------------|-------------------|---|

<sup>a</sup> Numbered in the order of retention indices (RI).

<sup>b</sup> RI; Retention indices were determined using n-alkanes (C<sub>7</sub>– C<sub>30</sub>)

<sup>c</sup> Mean values of relative peak area to the area of internal standard ± standard deviation.

<sup>d</sup> Identification of the compounds was performed as follows: C, mass spectrum was consistent with that of W9N08 and manual interpretation (tentative identification); B, retention index and mass spectrum were consistent with those from the NIST Chemistry Webbook (tentative identification); A, retention index and mass spectrum matched with those of authentic compounds (positive identification)

<sup>e</sup> Not detected.

<sup>f</sup> There are significant differences (p<0.05) among each *B. subtilis* sample collected according to cultivation time determined using Duncan's multiple range test between different times having different lowercase letters.

**Table S3. Non-volatile metabolites identified in *Bacillus subtilis*.**

| NO. <sup>a</sup>   | Non-volatile metabolites | Qt<br>m/z <sup>b</sup> | Relative peak area ratio (Mean±SD) |                                |                    |                    |                    |                   |                   |                   |
|--------------------|--------------------------|------------------------|------------------------------------|--------------------------------|--------------------|--------------------|--------------------|-------------------|-------------------|-------------------|
|                    |                          |                        | L9                                 | L17                            | L25                | L33                | H9                 | H17               | H25               | H33               |
| <i>Amino acids</i> |                          |                        |                                    |                                |                    |                    |                    |                   |                   |                   |
| A1                 | ethanolamine             | 147                    | 0.827±<br>0.070ab <sup>f</sup>     | 0.912±<br>0.072ab              | 0.710±<br>0.212a   | 1.051±<br>0.024b   | 0.977±<br>0.361a   | 0.911±<br>0.143a  | 0.688±<br>0.039a  | 1.020±<br>0.028a  |
| A2                 | oxoproline               | 156                    | 1.601±<br>0.118a                   | 5.564±<br>0.140c* <sup>e</sup> | 5.138±<br>0.034b*  | 1.509±<br>0.069a   | 3.579±<br>0.212a*  | 4.451±<br>0.024b  | 4.379±<br>0.058b  | 6.129±<br>0.024c* |
| A3                 | α-ketoglutarate          | 147                    | 0.001±<br>0.000a                   | 0.006±<br>0.004a               | 0.004±<br>0.005a   | 0.001±<br>0.000a   | 0.032±<br>0.027a   | 0.013±<br>0.008a  | 0.006±<br>0.003a  | 0.009±<br>0.007a* |
| A4                 | citrulline               | 157                    | 0.004±<br>0.000a                   | 0.008±<br>0.003c               | 0.008±<br>0.000bc* | 0.005±<br>0.000ab  | 0.004±<br>0.001a   | 0.011±<br>0.014a  | 0.006±<br>0.001a  | 0.010±<br>0.001a* |
| A5                 | alanine-alanine          | 116                    | 0.088±<br>0.007a                   | 1.797±<br>0.116c*              | 0.611±<br>0.517b   | 0.140±<br>0.005ab* | 0.518±<br>0.044ab* | 0.030±<br>0.016a  | 1.133±<br>0.908b  | 0.051±<br>0.016a  |
| A6                 | tyrosine                 | 218                    | 0.077±<br>0.008a                   | 0.336±<br>0.051c               | 0.228±<br>0.006b*  | 0.059±<br>0.007a   | 0.062±<br>0.007a   | 0.294±<br>0.040c  | 0.180±<br>0.012b  | 0.380±<br>0.005d* |
| A7                 | glycyl-proline           | 174                    | 0.001±<br>0.001a                   | 0.062±<br>0.021b               | 0.079±<br>0.010b*  | 0.002±<br>0.000a   | 0.003±<br>0.000a   | 0.035±<br>0.000b  | 0.058±<br>0.007c  | 0.071±<br>0.003d* |
| A8                 | alanine                  | 116                    | 0.295±<br>0.047c                   | 0.461±<br>0.039d*              | 0.172±<br>0.006b   | 0.103±<br>0.005a   | 0.473±<br>0.047c*  | 0.271±<br>0.012b  | 0.167±<br>0.009a  | 0.309±<br>0.021b* |
| A9                 | glutamic acid            | 246                    | 1.816±<br>0.140b                   | 4.316±<br>0.169d*              | 4.065±<br>0.119c   | 1.516±<br>0.033a   | 2.588±<br>0.546a   | 3.833±<br>0.093bc | 3.337±<br>0.732ab | 4.480±<br>0.318c* |
| A10                | asparagine               | 100                    | 0.006±<br>0.001a                   | 0.039±<br>0.008b*              | 0.037±<br>0.002b*  | 0.010±<br>0.001a   | 0.006±<br>0.001a   | 0.014±<br>0.003b  | 0.012±<br>0.001b  | 0.017±<br>0.002c* |
| A11                | lysine                   | 156                    | 0.358±<br>0.199a                   | 0.939±<br>0.041b*              | 0.793±<br>0.022b   | 0.499±<br>0.012a   | 0.679±<br>0.053a   | 0.710±<br>0.073a  | 0.724±<br>0.046a  | 0.971±<br>0.087b* |
| A12                | leucine                  | 299                    | 1.416±<br>0.156a                   | 2.254±<br>0.034c               | 2.002±<br>0.015b   | 1.369±<br>0.133a   | 2.355±<br>0.059a*  | 2.171±<br>0.048a  | 2.003±<br>0.037a  | 2.089±<br>0.379a  |
| A13                | urea                     | 171                    | 0.050±<br>0.003b                   | 0.288±<br>0.037d               | 0.232±<br>0.005c*  | 0.008±<br>0.005a   | 0.091±<br>0.056a   | 0.268±<br>0.046c  | 0.173±<br>0.011b  | 0.419±<br>0.047d* |
| A14                | glycine                  | 174                    | 0.199±<br>0.015a                   | 0.620±<br>0.040c               | 1.272±<br>0.033d*  | 0.402±<br>0.017b   | 0.496±<br>0.063a*  | 0.770±<br>0.105b  | 0.708±<br>0.060b  | 0.500±<br>0.019a* |
| A15                | phenylalanine            | 218                    | 0.168±<br>0.035b*                  | 0.288±<br>0.044c               | 0.155±<br>0.004b   | 0.065±<br>0.005a   | 0.076±<br>0.018a   | 0.242±<br>0.006b  | 0.086±<br>0.067a  | 0.566±<br>0.026c* |
| A16                | histidine                | 154                    | 0.097±<br>0.012a                   | 0.253±<br>0.039c*              | 0.180±<br>0.010b*  | 0.074±<br>0.005a   | 0.079±<br>0.004a   | 0.104±<br>0.034a  | 0.099±<br>0.007a  | 0.182±<br>0.002b* |
| A17                | ornithine                | 142                    | 0.029±<br>0.004a                   | 0.095±<br>0.007b               | 0.101±<br>0.010b   | 0.032±<br>0.001a   | 0.050±<br>0.018a   | 0.061±<br>0.052a  | 0.104±<br>0.002ab | 0.128±<br>0.025b* |
| A18                | cysteine                 | 147                    | 0.043±<br>0.004a                   | 0.126±<br>0.073a               | 0.123±<br>0.104a   | 0.051±<br>0.002a   | 0.045±<br>0.021a   | 0.100±<br>0.083a  | 0.038±<br>0.053a  | 0.159±<br>0.086a* |
| A19                | 4-hydroxyproline         | 230                    | 0.003±<br>0.000a                   | 0.585±<br>0.015c               | 0.325±<br>0.172b   | 0.004±<br>0.000a   | 0.309±<br>0.028a*  | 0.312±<br>0.233a  | 0.410±<br>0.025a  | 0.485±<br>0.019a  |



|                      |                        |     |                   |                   |                   |                   |                    |                   |                   |                   |
|----------------------|------------------------|-----|-------------------|-------------------|-------------------|-------------------|--------------------|-------------------|-------------------|-------------------|
| A20                  | methionine             | 176 | 0.098±<br>0.011b  | 0.395±<br>0.026c  | 0.461±<br>0.002d  | 0.060±<br>0.011a  | 0.214±<br>0.030a*  | 0.583±<br>0.020b* | 0.550±<br>0.019b* | 1.497±<br>0.017c* |
| A21                  | 4-aminobutyric acid    | 174 | 0.111±<br>0.019a  | 0.778±<br>0.085b  | 0.972±<br>0.036c* | 0.196±<br>0.009a* | 0.363±<br>0.044a   | 0.751±<br>0.072b  | 0.722±<br>0.079b  | 1.198±<br>0.127c* |
| A22                  | isoleucine             | 158 | 0.039±<br>0.004b* | 0.028±<br>0.007a  | 0.022±<br>0.004a* | 0.024±<br>0.003a  | 0.014±<br>0.005a   | 0.057±<br>0.017b  | 0.007±<br>0.001a  | 0.101±<br>0.001c* |
| A23                  | aspartic acid          | 232 | 0.080±<br>0.068a  | 0.498±<br>0.025b  | 0.594±<br>0.005c* | 0.048±<br>0.041a  | 0.436±<br>0.032b*  | 0.677±<br>0.032d* | 0.503±<br>0.013c  | 0.290±<br>0.015a* |
| A24                  | threonine              | 117 | 0.189±<br>0.024a* | 1.081±<br>0.227b  | 0.816±<br>0.593b  | 0.058±<br>0.051a  | 1.828±<br>0.164ab  | 2.069±<br>0.098b* | 1.726±<br>0.018a  | 2.099±<br>0.273b* |
| A25                  | glutamine              | 156 | 0.004±<br>0.001a  | 0.306±<br>0.019b* | 1.025±<br>0.054c  | 0.038±<br>0.004a  | 0.002±<br>0.000a   | 0.019±<br>0.007a  | 0.165±<br>0.070b* | 0.104±<br>0.016b* |
| <i>Fatty acids</i>   |                        |     |                   |                   |                   |                   |                    |                   |                   |                   |
| F1                   | lauric acid            | 147 | 0.009±<br>0.000a  | 0.025±<br>0.005a  | 0.021±<br>0.018a  | 0.011±<br>0.002a  | 0.014±<br>0.009a   | 0.051±<br>0.013b* | 0.051±<br>0.018b  | 0.013±<br>0.014a  |
| F2                   | myristic acid          | 117 | 0.033±<br>0.002a  | 0.021±<br>0.020a  | 0.027±<br>0.018a  | 0.028±<br>0.001a  | 0.119±<br>0.007ab* | 0.054±<br>0.001a  | 0.064±<br>0.006a* | 0.167±<br>0.068b  |
| F3                   | β-hydroxymyristic acid | 147 | 0.015±<br>0.000a  | 0.534±<br>0.453a  | 0.196±<br>0.287a  | 0.020±<br>0.007a  | 0.056±<br>0.003a*  | 0.048±<br>0.021a  | 0.072±<br>0.070a  | 0.040±<br>0.008a* |
| F4                   | isoheptadecanoic acid  | 117 | 0.077±<br>0.007a  | 0.094±<br>0.026a  | 0.066±<br>0.011a  | 0.082±<br>0.002a  | 0.152±<br>0.001b*  | 0.108±<br>0.019a  | 0.095±<br>0.018a  | 0.114±<br>0.011a* |
| F5                   | stearic acid           | 117 | 2.156±<br>0.059a* | 2.033±<br>0.370a  | 1.978±<br>0.072a  | 1.859±<br>0.040a  | 1.867±<br>0.023a   | 2.070±<br>0.112a  | 2.006±<br>0.028a  | 2.400±<br>0.522a  |
| F6                   | palmitic acid          | 117 | 1.578±<br>0.050ab | 1.648±<br>0.262b  | 1.476±<br>0.031ab | 1.340±<br>0.031a  | 1.577±<br>0.017a   | 1.642±<br>0.020a  | 1.568±<br>0.111a  | 1.651±<br>0.198a  |
| <i>Organic acids</i> |                        |     |                   |                   |                   |                   |                    |                   |                   |                   |
| O1                   | oxamic acid            | 147 | 0.002±<br>0.000a  | 0.455±<br>0.006c  | 0.328±<br>0.016b  | 0.002±<br>0.000a  | 0.589±<br>0.398ab  | 0.437±<br>0.027ab | 0.241±<br>0.011a* | 0.871±<br>0.225b* |
| O2                   | maleic acid            | 147 | 0.019±<br>0.002a  | 0.168±<br>0.015a  | 0.189±<br>0.185a  | 0.030±<br>0.002a  | 0.114±<br>0.071a   | 0.274±<br>0.238a  | 0.091±<br>0.061a  | 1.475±<br>0.381b* |
| O3                   | citraconic acid        | 147 | 0.052±<br>0.004a* | 0.135±<br>0.029c* | 0.101±<br>0.010b  | 0.025±<br>0.005a  | 0.079±<br>0.011a   | 0.085±<br>0.002a  | 0.091±<br>0.009a  | 0.264±<br>0.061b* |
| O4                   | malate                 | 147 | 0.025±<br>0.002c  | 0.016±<br>0.007b  | 0.010±<br>0.002ab | 0.005±<br>0.000a  | 0.070±<br>0.014a*  | 0.064±<br>0.013a* | 0.029±<br>0.001a* | 0.045±<br>0.042a  |
| O5                   | threonic acid          | 147 | 0.298±<br>0.003a  | 0.500±<br>0.094b  | 1.333±<br>0.166c* | 0.350±<br>0.013ab | 0.135±<br>0.078a   | 0.978±<br>0.423b  | 0.333±<br>0.059a  | 0.976±<br>0.271b* |
| O6                   | 2-hydroxyglutaric acid | 129 | 0.004±<br>0.000a  | 0.015±<br>0.003c  | 0.008±<br>0.001b  | 0.004±<br>0.000a  | 0.188±<br>0.017c*  | 0.038±<br>0.004a* | 0.023±<br>0.002a* | 0.106±<br>0.028b* |
| O7                   | 3-phenyllactic acid    | 147 | 0.036±<br>0.053a  | 1.025±<br>0.940a  | 0.291±<br>0.049a  | 0.626±<br>0.867a  | 0.189±<br>0.020a*  | 0.425±<br>0.042a  | 0.108±<br>0.171a  | 0.333±<br>0.266a  |
| O8                   | 3-phosphoglycerate     | 147 | 0.012±<br>0.002a  | 0.077±<br>0.010c* | 0.054±<br>0.003b* | 0.009±<br>0.000a  | 0.066±<br>0.004b*  | 0.043±<br>0.010a  | 0.033±<br>0.005a  | 0.049±<br>0.014a* |

|                                  |                      |     |                   |                    |                   |                   |                   |                   |                   |                   |
|----------------------------------|----------------------|-----|-------------------|--------------------|-------------------|-------------------|-------------------|-------------------|-------------------|-------------------|
| O9                               | isocitric acid       | 117 | 0.010±<br>0.008a  | 0.078±<br>0.003c   | 0.062±<br>0.002b  | 0.017±<br>0.001a  | 0.063±<br>0.007a* | 0.096±<br>0.009a* | 0.093±<br>0.002a* | 0.196±<br>0.053b* |
| O10                              | saccharic acid       | 147 | 0.002±<br>0.000a  | 0.055±<br>0.016c   | 0.027±<br>0.003b  | 0.002±<br>0.001a  | 0.050±<br>0.006a* | 0.089±<br>0.013b* | 0.058±<br>0.006a* | 0.163±<br>0.028c* |
| O11                              | glucosaminic acid    | 147 | 0.004±<br>0.000a  | 0.010±<br>0.012a   | 0.013±<br>0.015a  | 0.002±<br>0.000a  | 0.007±<br>0.000a* | 0.011±<br>0.006a  | 0.070±<br>0.094a  | 0.012±<br>0.014a  |
| O12                              | lactobionic acid     | 204 | 0.012±<br>0.002b* | 0.006±<br>0.000a   | 0.004±<br>0.000a  | 0.005±<br>0.000a  | 0.005±<br>0.004a  | 0.015±<br>0.001b* | 0.005±<br>0.000a  | 0.012±<br>0.003b  |
| O13                              | citric acid          | 273 | 0.032±<br>0.008a  | 0.226±<br>0.117b   | 0.183±<br>0.085b  | 0.043±<br>0.002a  | 0.106±<br>0.093a  | 0.364±<br>0.039a  | 0.253±<br>0.177a  | 0.450±<br>0.360a  |
| O14                              | succinic acid        | 148 | 0.052±<br>0.022a  | 0.165±<br>0.261a   | 0.160±<br>0.138a  | 0.016±<br>0.003a  | 1.793±<br>0.130b* | 0.400±<br>0.542a  | 0.413±<br>0.307a  | 1.802±<br>0.408b* |
| <i>Sugars and sugar alcohols</i> |                      |     |                   |                    |                   |                   |                   |                   |                   |                   |
| C1                               | 3,6-anhydro-D-hexose | 147 | 0.002±<br>0.000a  | 0.071±<br>0.001ab* | 0.143±<br>0.122b  | 0.010±<br>0.001a  | 0.004±<br>0.002a  | 0.011±<br>0.001a  | 0.042±<br>0.015b  | 0.028±<br>0.005b* |
| C2                               | tagatose             | 147 | 0.001±<br>0.000a  | 0.003±<br>0.001c   | 0.002±<br>0.000ab | 0.002±<br>0.000bc | 0.004±<br>0.002a  | 0.023±<br>0.007c* | 0.013±<br>0.001b* | 0.015±<br>0.002b* |
| C3                               | 1,5-anhydroglucitol  | 103 | 0.003±<br>0.001ab | 0.007±<br>0.005b   | 0.001±<br>0.000a  | 0.001±<br>0.000a  | 0.009±<br>0.007a  | 0.016±<br>0.002a* | 0.020±<br>0.002a* | 0.070±<br>0.018b* |
| C4                               | pinitol              | 147 | 0.051±<br>0.005a  | 0.602±<br>0.038b   | 0.070±<br>0.027a  | 0.029±<br>0.001a  | 0.431±<br>0.038a* | 1.124±<br>0.044d* | 0.623±<br>0.022b* | 0.730±<br>0.010c* |
| C5                               | hexose               | 147 | 0.006±<br>0.002a  | 0.318±<br>0.078b   | 0.069±<br>0.003a  | 0.005±<br>0.001a  | 0.018±<br>0.001a* | 0.260±<br>0.036d  | 0.116±<br>0.015b* | 0.178±<br>0.004c* |
| C6                               | hexitol              | 147 | 0.003±<br>0.000a  | 0.370±<br>0.055c*  | 0.221±<br>0.022b  | 0.006±<br>0.000a  | 0.011±<br>0.001a* | 0.161±<br>0.024d  | 0.070±<br>0.012b  | 0.110±<br>0.008c* |
| C7                               | cellobiose           | 147 | 0.002±<br>0.000a  | 0.004±<br>0.003a   | 0.002±<br>0.000a* | 0.003±<br>0.000a* | 0.008±<br>0.001b* | 0.000±<br>0.000a  | 0.000±<br>0.000a  | 0.001±<br>0.000a  |
| C8                               | galactinol           | 204 | 0.002±<br>0.000ab | 0.002±<br>0.001b   | 0.003±<br>0.000b  | 0.001±<br>0.000a  | 0.006±<br>0.000a* | 0.011±<br>0.004b* | 0.003±<br>0.001a  | 0.002±<br>0.001a* |
| C9                               | fructose             | 147 | 0.009±<br>0.001a* | 0.017±<br>0.007b   | 0.007±<br>0.001a  | 0.007±<br>0.000a  | 0.007±<br>0.000a  | 0.008±<br>0.002ab | 0.008±<br>0.002b  | 0.012±<br>0.004b  |
| C10                              | sucrose              | 147 | 0.005±<br>0.005a  | 0.007±<br>0.006a   | 0.028±<br>0.018b  | 0.001±<br>0.001a  | 0.010±<br>0.001b  | 0.002±<br>0.001a  | 0.004±<br>0.003a  | 0.002±<br>0.003a  |
| C11                              | myo-inositol         | 147 | 0.005±<br>0.000a  | 0.042±<br>0.013c   | 0.029±<br>0.001b  | 0.003±<br>0.000a  | 0.013±<br>0.002a* | 0.102±<br>0.010c* | 0.060±<br>0.008b* | 0.117±<br>0.011c* |
| <i>Others</i>                    |                      |     |                   |                    |                   |                   |                   |                   |                   |                   |
| E1                               | glycerol             | 147 | 0.351±<br>0.004b  | 0.453±<br>0.030c   | 0.374±<br>0.005b* | 0.290±<br>0.009a  | 0.292±<br>0.133a  | 0.417±<br>0.019a  | 0.338±<br>0.016a  | 0.360±<br>0.170a  |
| E2                               | propane-1,3-diol     | 147 | 0.037±<br>0.063a  | 2.400±<br>0.300c   | 0.667±<br>0.011b  | 0.049±<br>0.006a  | 0.683±<br>0.136a* | 1.863±<br>0.201b  | 0.942±<br>0.162a  | 0.571±<br>0.422a* |
| E3                               | pyrophosphate        | 110 | 0.016±<br>0.002a  | 0.046±<br>0.013b   | 0.045±<br>0.013b  | 0.014±<br>0.002a  | 0.080±<br>0.019b* | 0.053±<br>0.025ab | 0.068±<br>0.020ab | 0.039±<br>0.004a* |

|     |                               |     |                   |                    |                    |                    |                   |                   |                   |                   |
|-----|-------------------------------|-----|-------------------|--------------------|--------------------|--------------------|-------------------|-------------------|-------------------|-------------------|
| E4  | phosphate                     | 299 | 0.699±<br>0.137b  | 0.543±<br>0.019a   | 0.518±<br>0.006a   | 0.656±<br>0.059ab* | 0.595±<br>0.072b  | 0.527±<br>0.016ab | 0.506±<br>0.006a  | 0.538±<br>0.010ab |
| E5  | nicotinamide                  | 179 | 0.022±<br>0.001a  | 0.082±<br>0.003c   | 0.052±<br>0.004b   | 0.018±<br>0.001a   | 0.213±<br>0.017d* | 0.130±<br>0.004c* | 0.072±<br>0.006a* | 0.109±<br>0.006b* |
| E6  | glycerol-1-phosphate          | 211 | 0.630±<br>0.044a  | 0.733±<br>0.132a   | 0.702±<br>0.163a   | 0.649±<br>0.008a   | 0.899±<br>0.020b* | 0.542±<br>0.343ab | 0.720±<br>0.112ab | 0.387±<br>0.335a  |
| E7  | glycerol-α-phosphate          | 299 | 0.041±<br>0.007b  | 0.077±<br>0.001c   | 0.089±<br>0.006d*  | 0.020±<br>0.001a   | 0.091±<br>0.008a* | 0.082±<br>0.007a  | 0.061±<br>0.005a  | 0.056±<br>0.049a  |
| E8  | guanine                       | 352 | 0.025±<br>0.002b* | 0.029±<br>0.007b*  | 0.008±<br>0.001a*  | 0.010±<br>0.000a*  | 0.003±<br>0.000c  | 0.001±<br>0.000b  | 0.001±<br>0.000a  | 0.002±<br>0.000c  |
| E9  | uridine                       | 147 | 0.018±<br>0.007b* | 0.018±<br>0.007b*  | 0.012±<br>0.001ab* | 0.006±<br>0.004a   | 0.005±<br>0.002a  | 0.003±<br>0.003a  | 0.006±<br>0.001a  | 0.008±<br>0.004a  |
| E10 | adenosine                     | 169 | 0.004±<br>0.001a* | 0.010±<br>0.006b   | 0.003±<br>0.000a*  | 0.004±<br>0.000a   | 0.002±<br>0.000a  | 0.002±<br>0.000a  | 0.002±<br>0.000a  | 0.003±<br>0.001b  |
| E11 | guanosine                     | 147 | 0.023±<br>0.002b* | 0.017±<br>0.003ab* | 0.004±<br>0.000a*  | 0.111±<br>0.014c*  | 0.001±<br>0.000a  | 0.003±<br>0.000c  | 0.001±<br>0.000a  | 0.002±<br>0.000b  |
| E12 | adenosine-5-<br>monophosphate | 169 | 0.053±<br>0.010a  | 0.189±<br>0.047b   | 0.166±<br>0.020b*  | 0.035±<br>0.000a   | 0.291±<br>0.033b* | 0.190±<br>0.120ab | 0.128±<br>0.010a  | 0.293±<br>0.028b* |

<sup>a</sup> Numbered in the order of retention indices (RI).

<sup>b</sup> Quantitative m/z

<sup>c</sup> Mean values of relative peak area to the area of internal standard ± standard deviation.

<sup>d</sup> The meaning of the letters and numbers inside the score plot is the following: BL9, 17, 25 and 33 (lower level of BAs producing *B. subtilis* strain obtained at 9, 17, 25 and 33 h in replication, respectively), BH9, 17, 25 and 33 (higher level of BAs producing *B. subtilis* strain obtained at 9, 17, 25 and 33 h in replication, respectively)

<sup>e</sup> There are significant differences ( $p<0.05$ ) among samples collected according to strains determined using t-test between different samples having ‘\*’.

<sup>f</sup> There are significant differences ( $p<0.05$ ) among samples collected according to cultivation time determined using Duncan’s multiple range test between different times having different lowercase letters.

**Table S4.** The changes of amino acid precursors and BAs according to cultivation times.

| Metabolite         | Sample          | Cultivation time   |        |        |        |
|--------------------|-----------------|--------------------|--------|--------|--------|
|                    |                 | 9h                 | 17h    | 25h    | 33h    |
| Histidine          | BL <sup>a</sup> | 1.475 <sup>b</sup> | -0.285 | -0.465 | -0.725 |
|                    | BH              | -0.817             | -0.265 | -0.375 | 1.457  |
| Histamine          | BL              | 0.878              | 0.736  | -0.368 | -1.246 |
|                    | BH              | -0.554             | 0.275  | -0.996 | 1.275  |
| Phenylalanine      | BL              | -0.011             | 1.299  | -0.153 | -1.135 |
|                    | BH              | -0.728             | -0.002 | -0.684 | 1.415  |
| 2-Phenylethylamine | BL              | - <sup>c</sup>     | -      | -      | -      |
|                    | BH              | 0.256              | 0.310  | -1.440 | 0.875  |
| Ornithine          | BL              | -0.902             | 0.787  | 0.941  | -0.825 |
|                    | BH              | -0.978             | -0.677 | 0.499  | 1.156  |
| Glutamine          | BL              | -0.715             | -0.079 | 1.438  | -0.644 |
|                    | BH              | -0.926             | -0.703 | 1.215  | 0.414  |
| Putresine          | BL              | -0.866             | -0.866 | 0.843  | 0.889  |
|                    | BH              | -1.398             | 0.539  | 0.869  | -0.009 |
| Spermidine         | BL              | 0.471              | 0.110  | 0.849  | -1.430 |
|                    | BH              | -0.079             | 0.719  | -1.386 | 0.746  |

<sup>a</sup> The meaning of the letters is the following: BL (lower level of BAs producing *B. subtilis* strain), BH (higher level of BAs producing *B. subtilis* strain).

<sup>b</sup> z-score vlaues

<sup>c</sup> Not detected
